# Supplementary material for: Mitochondrial D-loop Sequence Variability in Three Native Insular Griffon Vulture (Gyps fulvus) Populations from the Mediterranean Basin
Source: Hindawi journal article supplement (doi:10.1155/2019/2073919), 2019-11-18
Supplement: f1 [file 2073919.f1.pdf]

TABLE S1: Values of neutrality tests (Fs and D) for griffon D-loop region sequences.

| Statistics                 | Sardinia | Cyprus  | Crete   | Mean    | S.D.    |
|----------------------------|----------|---------|---------|---------|---------|
| Tajima's D test            |          |         |         |         |         |
| Sample size                | 44       | 7       | 33      | 28.0000 | 19.0000 |
| S                          | 2        | 0       | 3       | 1.66667 | 1.52753 |
| Pi                         | 1.17970  | 0.00000 | 1.28788 | 0.82253 | 0.71438 |
| Tajima's D                 | 2.88407  | 0.00000 | 1.70127 | 1.52845 | 1.44978 |
| Tajima's D p-value         | 0.59350  | 1.00000 | 0.34640 | 0.64663 | 0.33002 |
| Fu's FS test               |          |         |         |         |         |
| No. of alleles (unchecked) | 3        | 1       | 3       | 2.33333 | 1.15470 |
| Theta_pi                   | 1.17970  | 0.00000 | 1.28788 | 0.82253 | 0.71438 |
| Exp. no. of alleles        | 4.85402  | 0.00000 | 4.76923 | 3.20775 | 2.77832 |
| FS                         | 2.48727  | 0.00000 | 2.45006 | 1.64577 | 1.42540 |
| FS p-value                 | 0.39850  | N.A.    | 0.40270 | N.A.    | N.A.    |

S: Number of sites with substitutions

Pi: Mean number of pairwise differences
